# Supplementary material
Source: publisher figshare collection journal article supplement (https://acs.figshare.com/ndownloader/files/13193333)
Supplement: Supplementary file 1 [file 13193333]

# Impact of Polymer Bioconjugation on Protein Stability and Activity Investigated with Discrete Conjugates: Alternatives to PEGylation

Josefine Morgenstern,<sup>‡,§</sup> Gabriela Gil Alvaradejo,<sup>‡,||,◇</sup> Nicolai Bluthardt,<sup>§</sup> Ana Beloqui,<sup>||,◇,†</sup>  
Guillaume Delaittre,<sup>\*, ||,◇</sup> Jürgen Hubbuch<sup>\*,§</sup>

<sup>§</sup>Institute of Engineering in Life Sciences, Section IV: Biomolecular Separation  
Engineering, Karlsruhe Institute of Technology (KIT), Karlsruhe, Germany

<sup>||</sup>Institute of Toxicology and Genetics (ITG), Karlsruhe Institute of Technology (KIT),  
Hermann-von-Helmholtz-Platz 1, 76344 Eggenstein-Leopoldshafen, Germany.

<sup>◇</sup>Macromolecular Architectures, Institute for Chemical Technology and Polymer  
Chemistry (ITCP), Karlsruhe Institute of Technology (KIT), 76128 Karlsruhe, Germany.

<sup>†</sup>These authors contributed equally to this work.

\*Corresponding Authors: [guillaume.delaittre@kit.edu](mailto:guillaume.delaittre@kit.edu); [juergen.hubbuch@kit.edu](mailto:juergen.hubbuch@kit.edu)

## Table of Contents

|                                                                        |     |
|------------------------------------------------------------------------|-----|
| <sup>1</sup> H NMR Spectra of NHS Ester-Functionalized Polymers.....   | S2  |
| UV–Vis Spectrophotometric Data.....                                    | S6  |
| Capillary Gel Electrophoresis.....                                     | S8  |
| Size-Exclusion Chromatography of Proteins and Conjugates.....          | S9  |
| Description of the High-Throughput Solubility Study of Conjugates..... | S11 |
| Phase Behavior of the Polymers.....                                    | S12 |
| References.....                                                        | S12 |

## <sup>1</sup>H NMR Spectra of NHS Ester-Functionalized Polymers

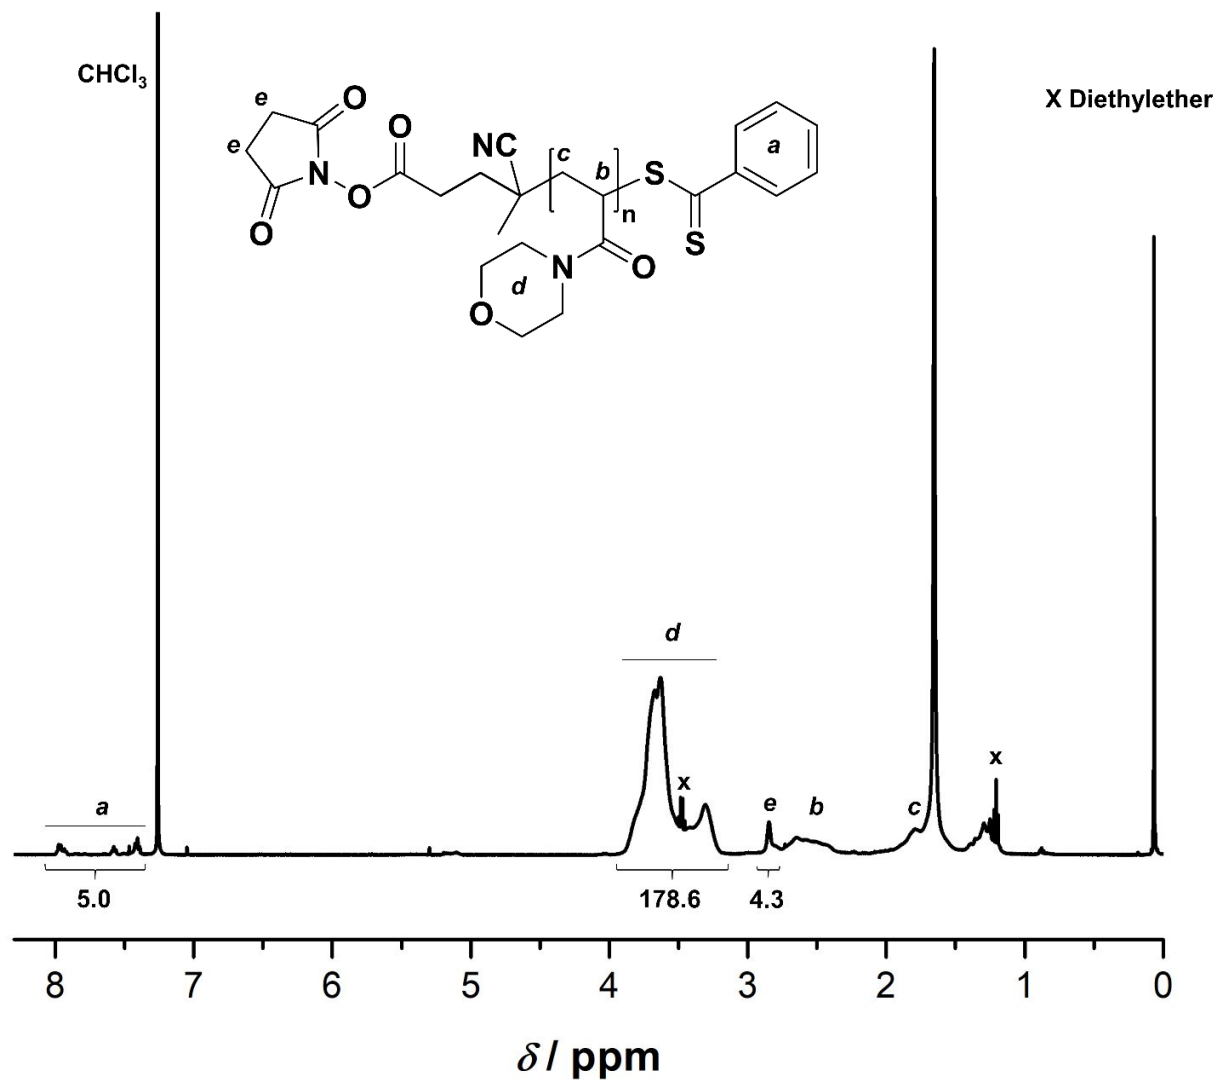

**Figure S1.** <sup>1</sup>H NMR spectrum of PNAM<sub>3.4kDa</sub>.

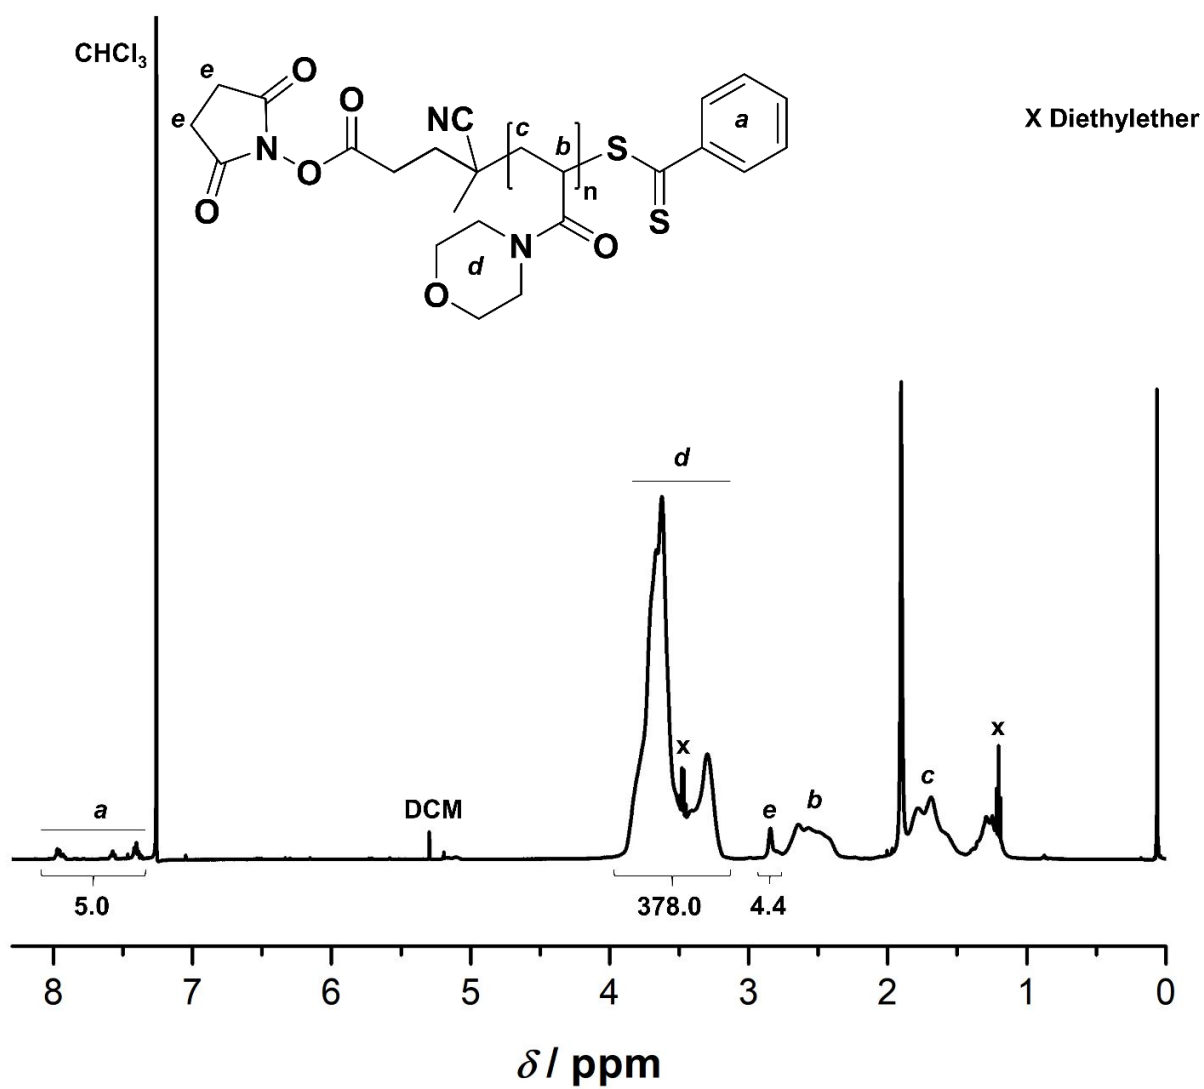

**Figure S2.**  $^1\text{H}$  NMR spectrum of PNAM<sub>6.9kDa</sub>.

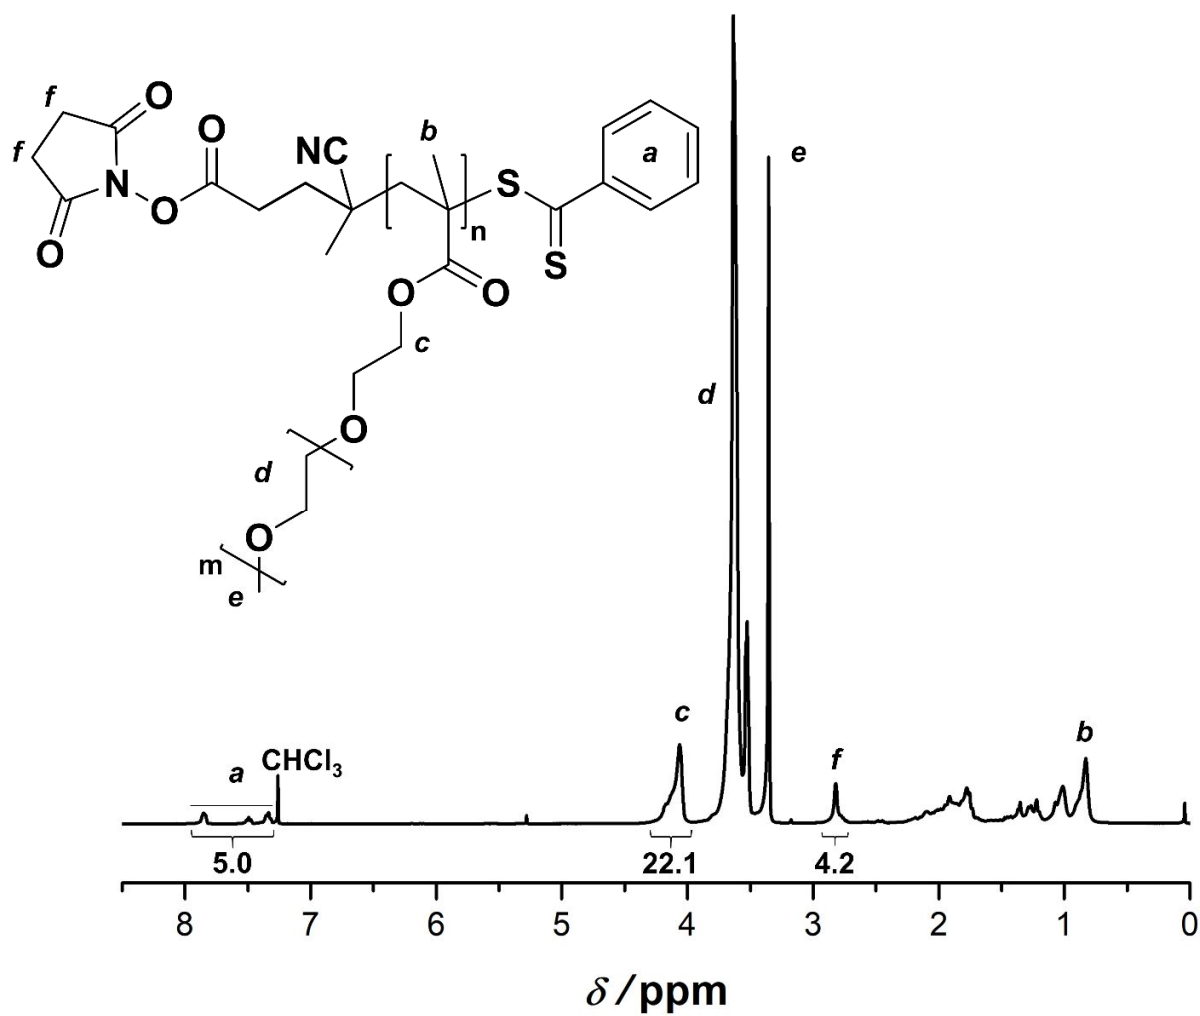

**Figure S3.**  $^1\text{H}$  NMR spectrum of POEGMA<sub>3.6kDa</sub>.

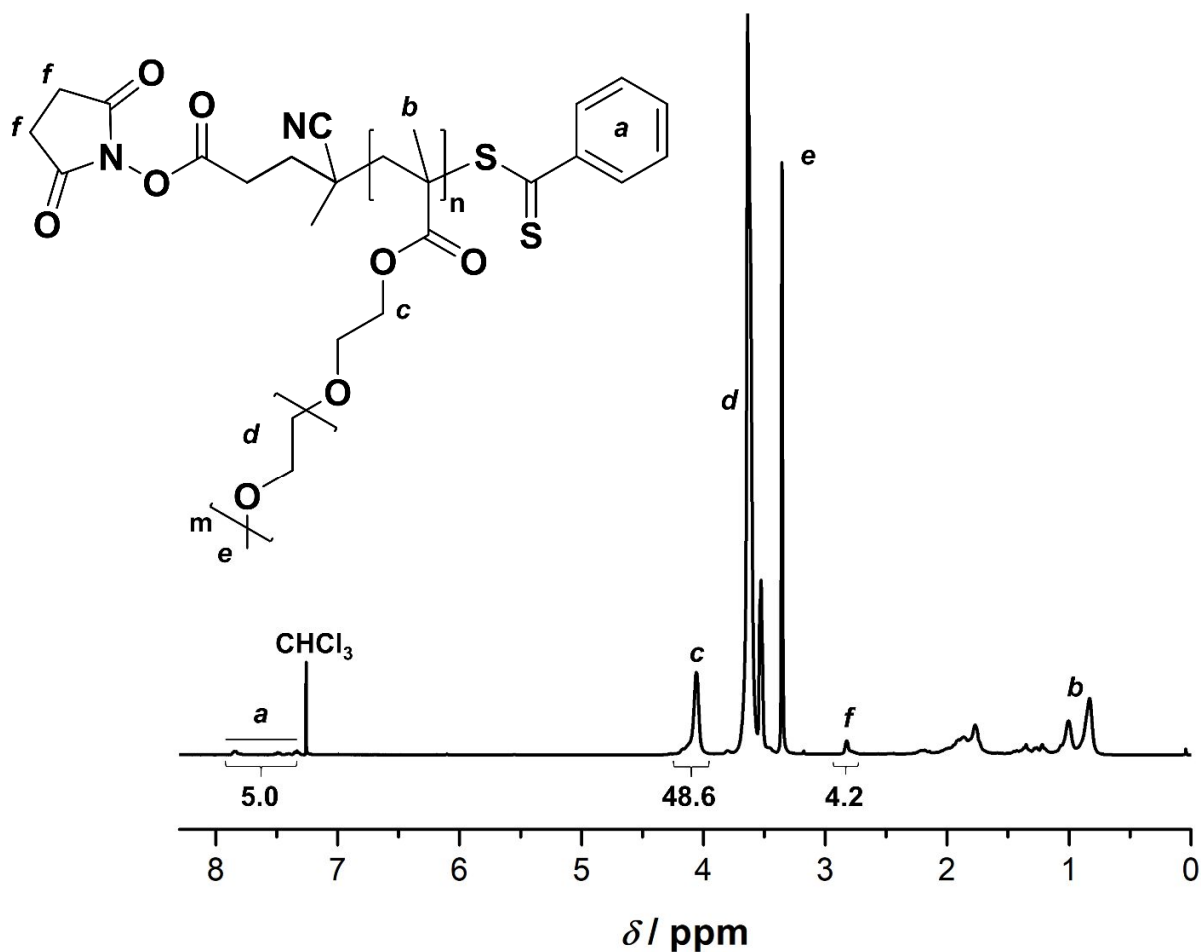

**Figure S4.**  $^1\text{H}$  NMR spectrum of POEGMA<sub>7.5kDa</sub>.

**Table S1.** Macromolecular characteristics of the NHS ester-functionalized PNAM and POEGMA used for lysozyme modification.

| Polymer                  | $M_{n,SEC}$ | $M_{n,NMR}^a$ | $\bar{D}$ |
|--------------------------|-------------|---------------|-----------|
| PNAM <sub>3.4kDa</sub>   | 1900        | 3500          | 1.08      |
| PNAM <sub>6.9kDa</sub>   | 3800        | 7000          | 1.09      |
| POEGMA <sub>3.6kDa</sub> | 3400        | 3700          | 1.10      |
| POEGMA <sub>7.5kDa</sub> | 6700        | 7700          | 1.10      |

<sup>a</sup>The NMR value includes the *N*-hydroxysuccinimide group, which was however not taken into account to name the polymers for better comparison of the conjugates since this group is removed during coupling to the protein.

## UV-Vis Spectrophotometric Data

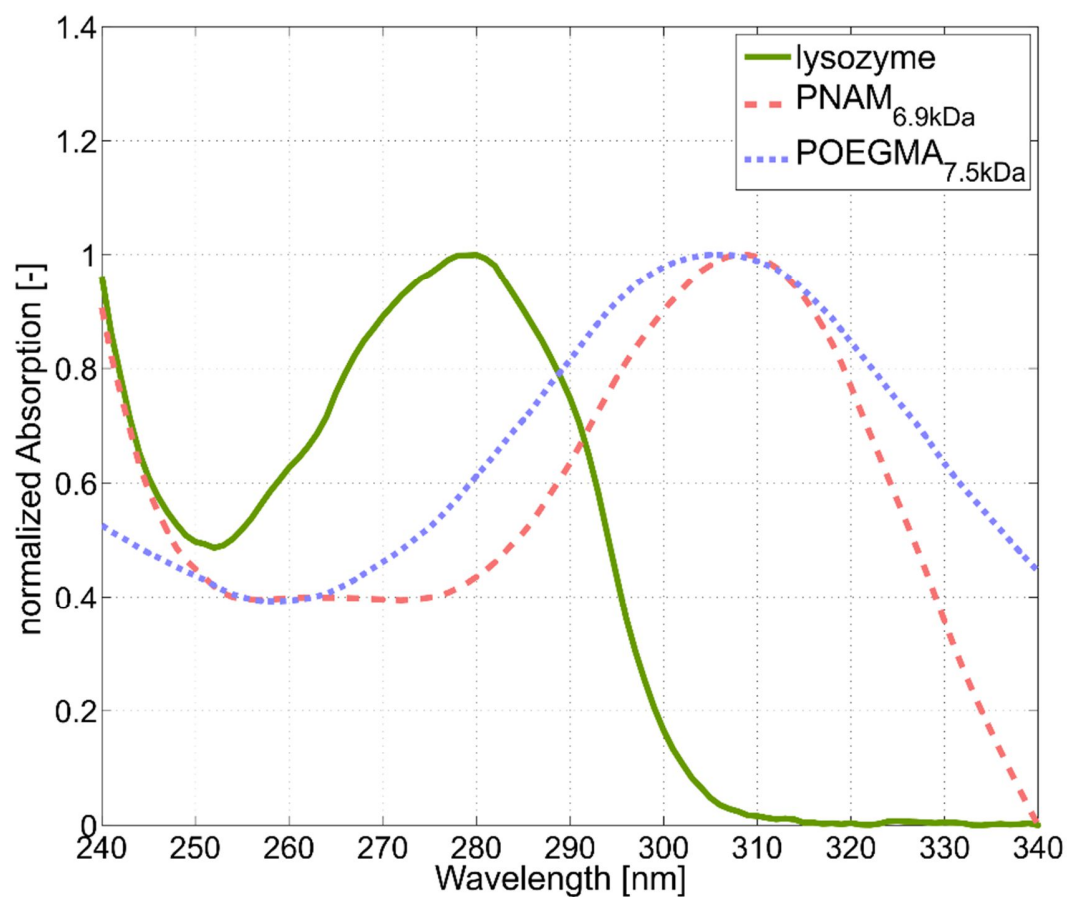

**Figure S5.** Absorption spectra of lysozyme, PNAM<sub>6.9kDa</sub>, and POEGMA<sub>7.5kDa</sub> normalized to their absorption maximum.

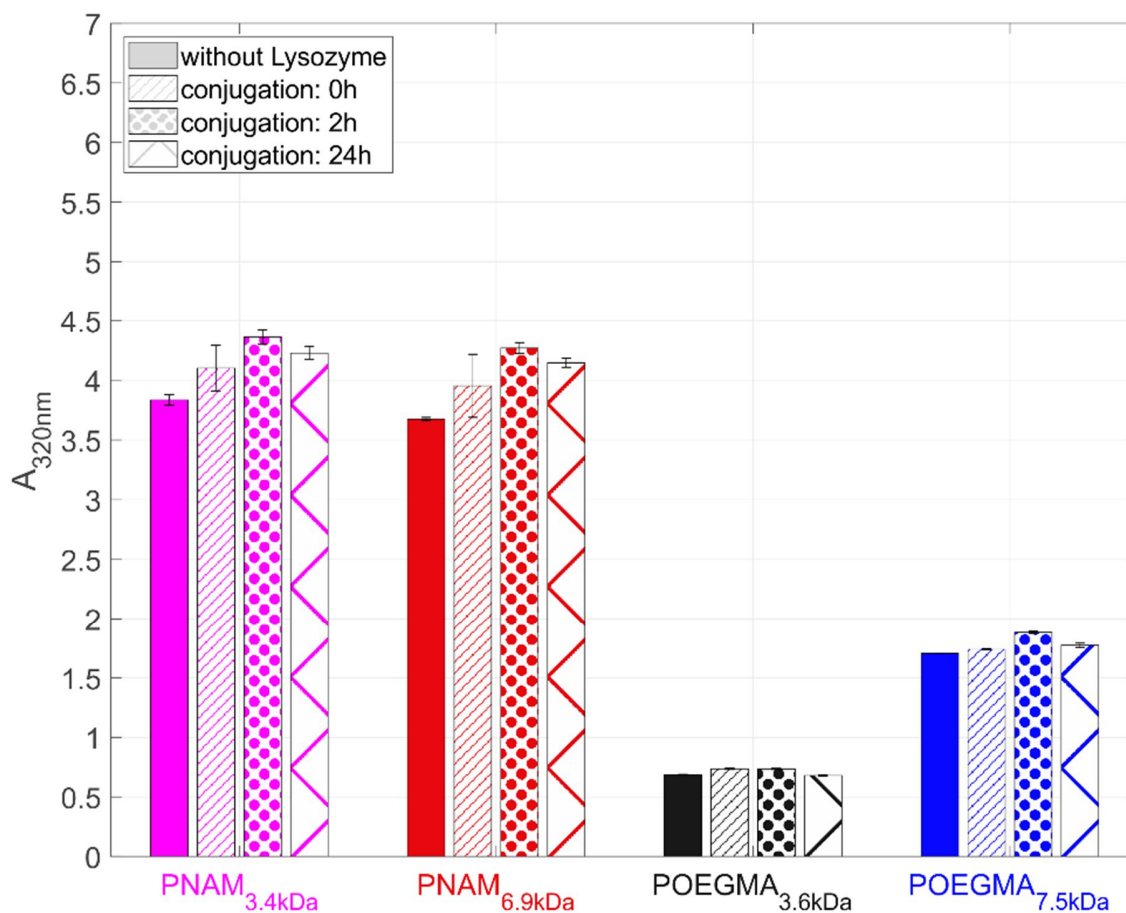

**Figure S6.** Absorbance at 320 nm ( $A_{320nm}$ ) for all polymers during the conjugation process with only the polymer in 25 mM sodium phosphate buffer at pH 7.2. (without Lysozyme), after adding lysozyme (conjugation: 0h), after two hours conjugation time (conjugation: 2h), and after twenty-four hours conjugation time (conjugation: 24h).  $A_{320nm}$  of each sample was measured as triplicate. For none of the investigated polymers is a decrease in  $A_{320nm}$  observable over time.

## Capillary Gel Electrophoresis

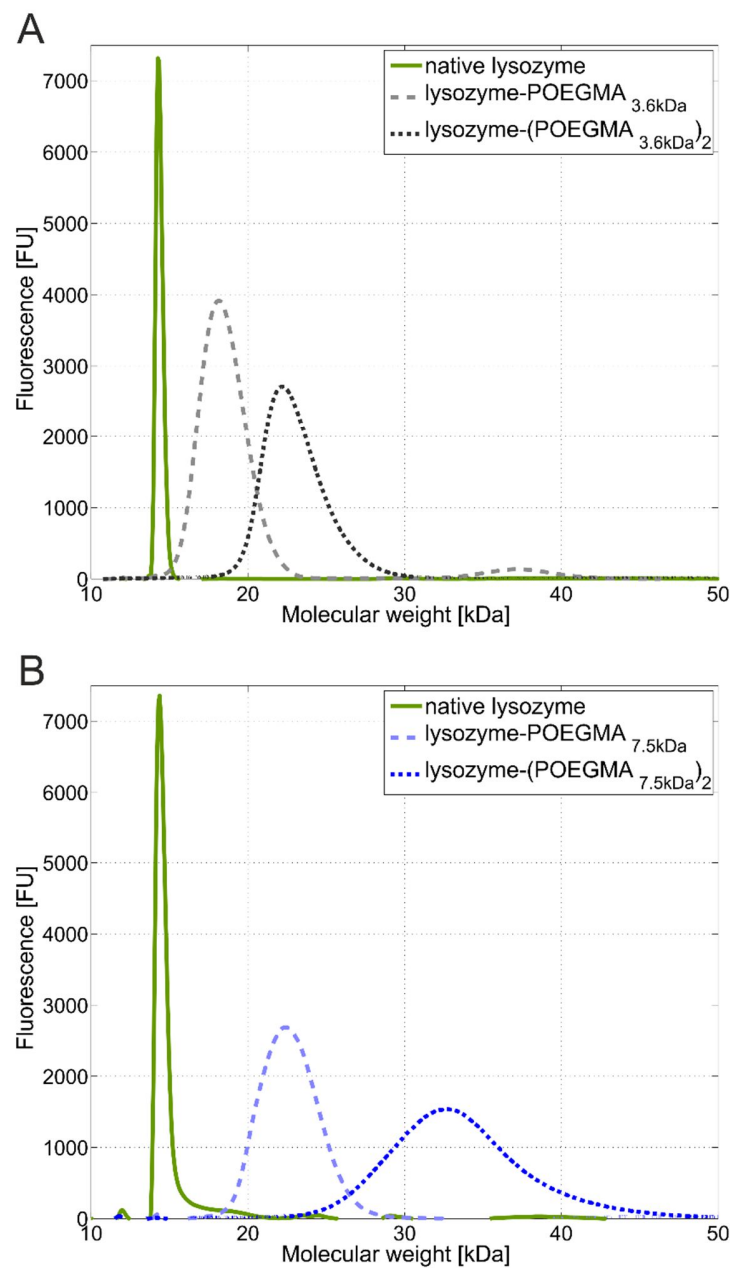

**Figure S7.** Analysis of the purified POEGMA<sub>3.6kDa</sub> (A) and POEGMA<sub>7.5kDa</sub> (B) conjugates using high-throughput capillary gel electrophoresis (HT-CGE), as compared to native lysozyme.<sup>1</sup>

## Size-Exclusion Chromatography of Proteins and Conjugates



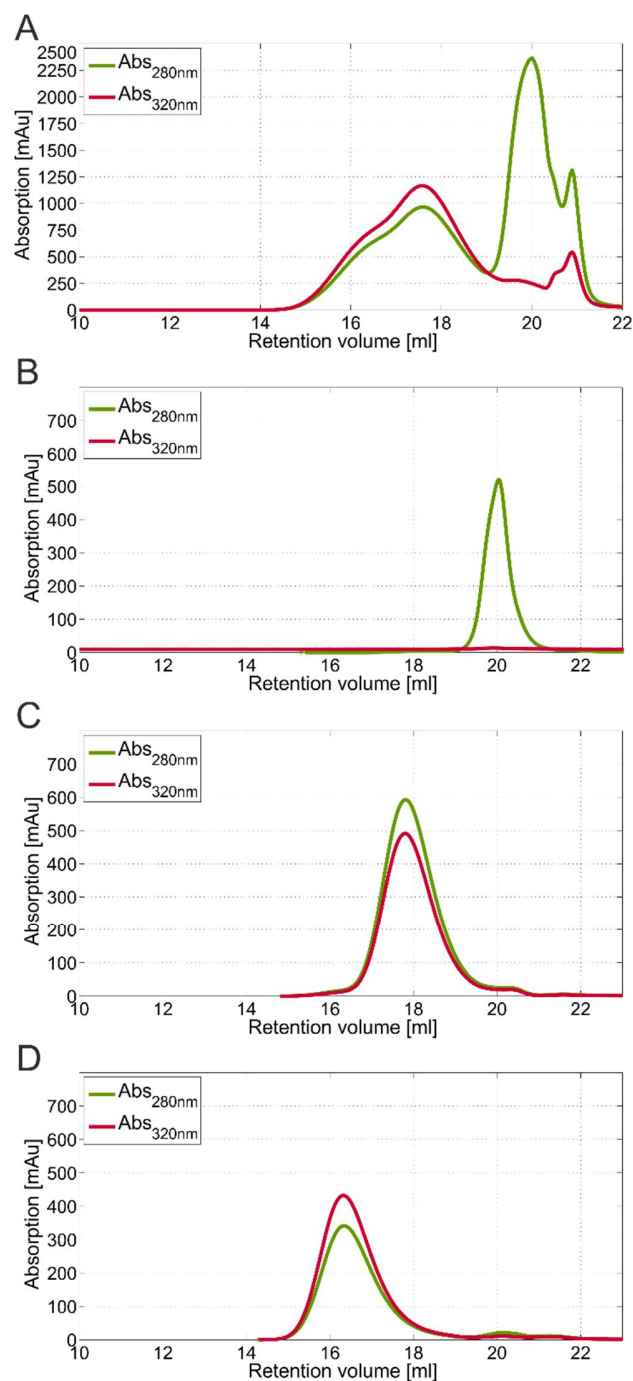

**Figure S8.** SEC chromatograms of the POEGMA<sub>3.6kDa</sub> conjugation batch (A) and the purified species of native lysozyme (B), lysozyme-POEGMA<sub>3.6kDa</sub> (C), and lysozyme-(POEGMA<sub>3.6kDa</sub>)<sub>2</sub> (D). The separation was performed on a Superdex200 Increase 10/300 (GE Healthcare) using 25 mM sodium phosphate buffer with 150 mM sodium chloride at pH 7.2.

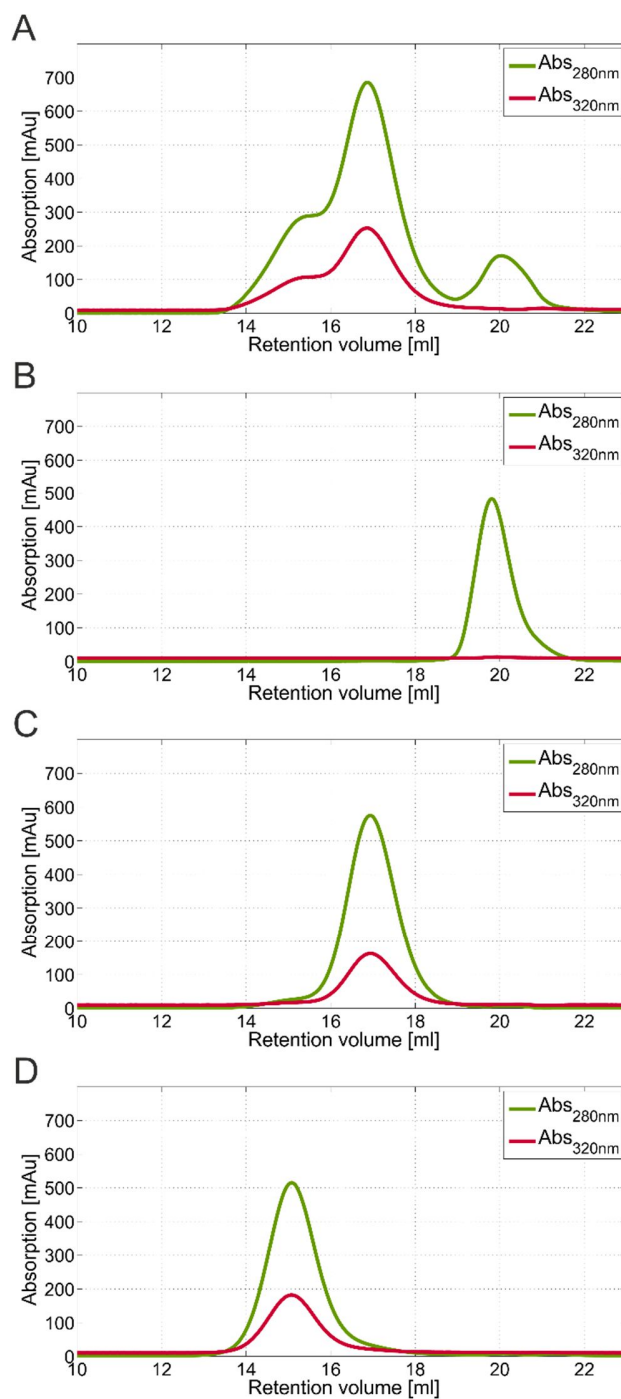

**Figure S9.** SEC chromatograms of the POEGMA<sub>7.5kDa</sub> conjugation batch (A) and the purified species of native lysozyme (B), lysozyme–POEGMA<sub>7.5kDa</sub> (C), and lysozyme–(POEGMA<sub>7.5kDa</sub>)<sub>2</sub> (D). The separation was performed on a Superdex200 Increase 10/300 (GE Healthcare) using 25 mM sodium phosphate buffer with 150 mM sodium chloride at pH 7.2.

## Description of the High-Throughput Solubility Study of Conjugates

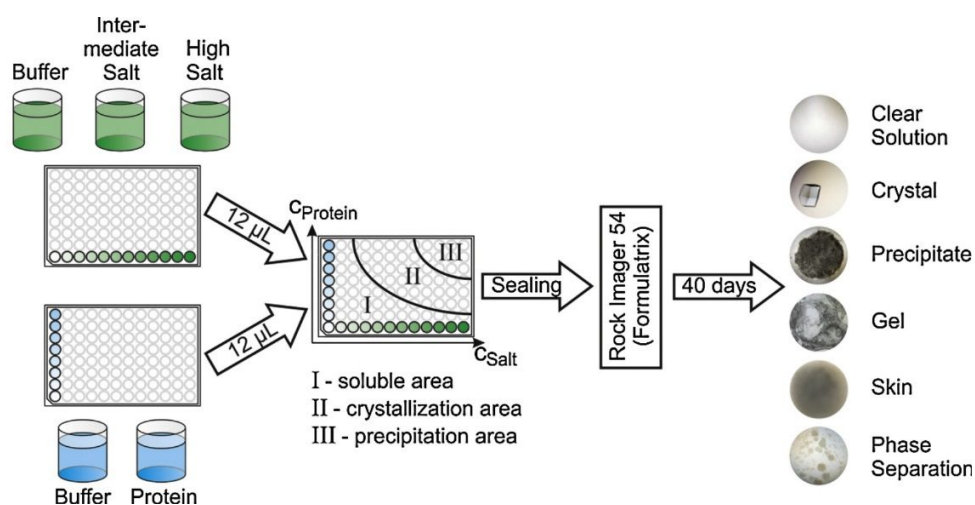

**Figure S10.** Schematic illustration of the experimental setup and evaluation of protein phase states for the generation of protein phase diagrams. The soluble (I), crystallization (II), and precipitation (III) areas are depicted in the phase diagram. Reproduced with permission from Elsevier.<sup>2</sup>

## Phase Behavior of the Polymers

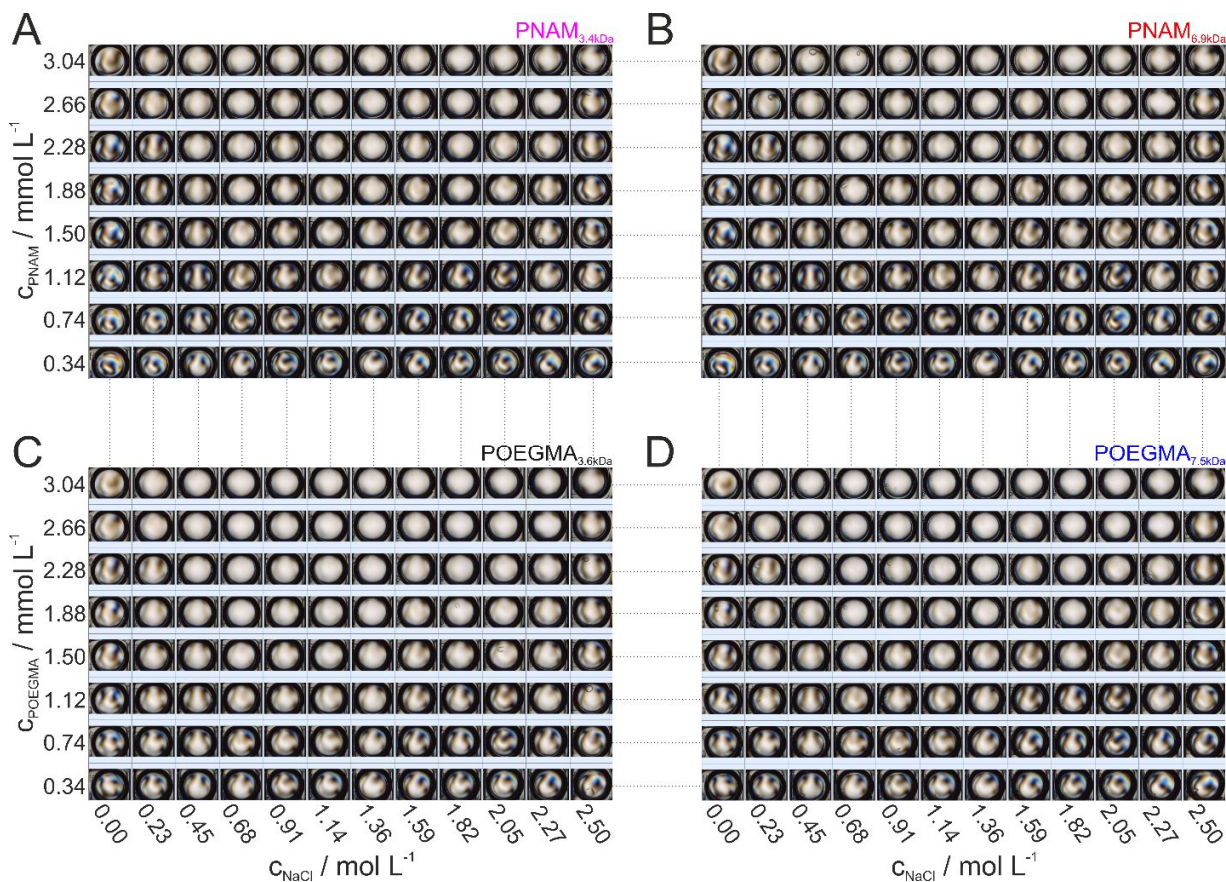

**Figure S11.** Phase behavior of (A) PNAM<sub>3.4kDa</sub>, (B) PNAM<sub>6.9kDa</sub>, (C) POEGMA<sub>3.6kDa</sub>, and (D) POEGMA<sub>7.5kDa</sub> under the influence of sodium chloride (NaCl) as precipitant at pH 3. Under the studied experimental conditions none of the investigated polymers undergoes phase transition.

## References

- (1) Morgenstern, J.; Busch, M.; Baumann, P.; Hubbuch, J. *J. Chromatogr. A* **2016**, *1462*, 153–164.
- (2) Baumgartner, K.; Galm, L.; Nötzold, J.; Sigloch, H.; Morgenstern, J.; Schleining, K.; Suhm, S.; Oelmeier, S. A.; Hubbuch, J. *Int. J. Pharm.* **2015**, *479* (1), 28–40.
